# Supplementary material for: ‘Out of sync’: a qualitative investigation of patients’ experiences of atrial fibrillation and perceptions of weight management
Source: PubMed Central journal article supplement — BMJ Open. 2022 Nov 7;12(11):e065995. doi: 10.1136/bmjopen-2022-065995 (PMC9644348; doi:10.1136/bmjopen-2022-065995), 2022-11-07
Supplement: bmjopen-2022-065995supp001.pdf [file bmjopen-2022-065995supp001.pdf]

### **HIWeiMan-AF Example questions for semi-structured interviews**

#### Example questions

##### Capability:

"I see that in the category "Usual Activities" you have answered "I have slight problems doing my usual activities" - can you tell me a bit about what your usual activities include? What do you consider the reasons for these problems?"

"In the Self Care category, you have responded that you have no problems in washing and dressing yourself. Are there any other areas of your self-care that you feel have been affected by your health problems e.g. cooking for yourself, doing exercise"

"In the Pain/Discomfort category you have responded that you have no pain or discomfort. I'm interested to know whether your AF symptoms such as breathlessness affect your ability to do physical exercise." If affirmative response, follow up with "How does that feel to you?"

##### Opportunity

"Thinking about your Usual Activities, are there things that you used to do or would like to do if you had the chance?"

"If you were to try to increase your physical exercise levels, how would you do that?" If no suggestions forthcoming prompt with "Are there any exercise classes at your local community centre?" or "Are there any parks or nice places to go for a walk around where you live?" or "Do you and your partner/family/friends do any activities together"?

##### Motivation

"In Anxiety/Depression you have responded that you feel moderately anxious or depressed. Is there anything in particular causing this?" If response includes diagnosis of AF or related symptoms, explore further with "Can you explain to me your understanding of your heart condition? How does that affect you?"

"What sort of information and advice have you been given by health care professionals about managing your AF symptoms? How did you feel about this?"
